# Supplementary material
Source: MDPI journal article supplement (https://www.mdpi.com/2311-7524/8/9/779)
Supplement: s1 [file s1]

## Supplementary material

*Submitted to* Special Issue “Horticultural Plants and By-Products as Sources of Biological Active Compounds”

# Phytostimulation and synergistic antipathogenic effect of *Tagetes erecta* extract in presence of rhizobacteria

Alina Perisoara <sup>1,2</sup>, Ioana Cristina Marinas <sup>3,4,\*</sup>, Elisabeta Irina Geana <sup>5</sup>, Mariana Constantin <sup>6,7</sup>, Marian Angheloiu <sup>4</sup>, Lucia Pirvu <sup>8</sup> and Stelica Cristea <sup>1,2</sup>

<sup>1</sup> Biotehnos SA., 3-5 Gorunului Street, 075100 Otopeni, Ilfov County, Romania

<sup>2</sup> Plant Pathology Departament, University of Agronomic Science and Veterinary Medicine Bucharest, 011464 București, Romania

<sup>3</sup> Research Institute of the University of Bucharest—ICUB, 91-95 Splaiul Independenței St., District 5, 050095 Bucharest, Romania

<sup>4</sup> Research and Development Department of SC Sanimed International Impex SRL, Șos. București-Giurgiu (DN5), No. 6, 087040 Călugăreni, Romania

<sup>5</sup> National R&D Institute for Cryogenics and Isotopic Technologies—ICIT, Rm. Valcea, 4 Uzinei St., 240050 Ramnicu Valcea, Romania

<sup>6</sup> National Institute for Research & Development in Chemistry and Petrochemistry-ICECHIM, 202 Independentei Spl., 060021 Bucharest, Romania

<sup>7</sup> Faculty of Pharmacy, Titu Maiorescu University, 16 Bd. Gh. Sincai, 040441 Bucharest, Romania

<sup>8</sup> National Institute for Chemical-Pharmaceutical Research and Development, 031282 Bucharest, Romania

\* Correspondence: ioana.cristina.marinas@gmail.com

**Table S1.** Main bands in the ATR-FTIR spectra of *T. erecta* flowers and their assignments. Peak positions are expressed in cm<sup>-1</sup>

| Bands dry extract (cm <sup>-1</sup> ) | Bands plant material (cm <sup>-1</sup> ) | Assignments                                                                  |
|---------------------------------------|------------------------------------------|------------------------------------------------------------------------------|
| 3261                                  | 3283                                     | O-H stretch, N-H stretching                                                  |
| 2926                                  | 2920                                     | C-H stretching                                                               |
|                                       | 2853                                     | C-H stretching                                                               |
|                                       | 1736                                     | C=O stretching                                                               |
|                                       | 1655                                     | Amide I, $\nu(\text{C=O})$ , random coil                                     |
|                                       | 1639                                     | Amide I, $\nu(\text{C=O})$ , $\beta$ -sheet                                  |
|                                       | 1626                                     | Amide I, $\nu(\text{C=O})$ , $\beta$ -sheet/chitin                           |
| 1598                                  |                                          | assigned to C=C stretching of the aromatic ring –syringyl and CH deformation |
| 1562                                  | 1562                                     | aromatic C-H stretching                                                      |
|                                       | 1542                                     | Amide II, $\nu(\text{C-N})$ , $\delta(\text{N-H})$ , random coil/chitin      |
|                                       | 1536                                     | amide II of proteins                                                         |
|                                       | 1510                                     | Aromatic skeletal vibrations                                                 |
| 1501                                  |                                          | C-C stretching                                                               |
|                                       | 1460                                     | CH <sub>2</sub> deformation stretching in lignin                             |
|                                       | 1451                                     | C-H bending                                                                  |
| 1441                                  |                                          | C=C stretching, aromatics                                                    |

|      |      |                                                                   |
|------|------|-------------------------------------------------------------------|
|      | 1439 | C-O-H bending vibrations (cellulose)                              |
|      | 1423 | CH <sub>2</sub> vibrations                                        |
| 1391 |      | C-H bending vibration                                             |
|      | 1378 | CH <sub>3</sub> , CH <sub>2</sub> bend                            |
| 1335 |      | stretching and bending of C-O and C-O-H                           |
|      | 1324 | C-O vibration in derivatives, CH in-plane bending in cellulose    |
| 1285 |      | ethereal C-O stretching vibration                                 |
|      | 1236 | Amide III, $\nu(\text{C-N})$ , $\delta(\text{N-H})$ , random coil |
| 1032 | 1032 | C-OH stretching (carbohydrates)                                   |
|      | 897  | Cellulose: C1-H deformation                                       |
| 819  |      | C-H out of plane bending                                          |
| 769  |      | aromatic groups (C=H)                                             |
|      | 672  | C-H deformations vibration in aromatic structures                 |

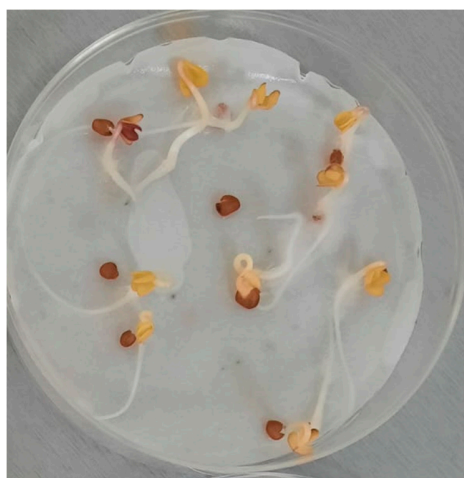

(a)

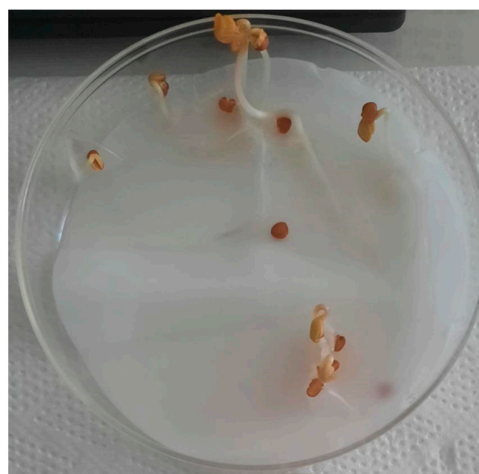

(b)

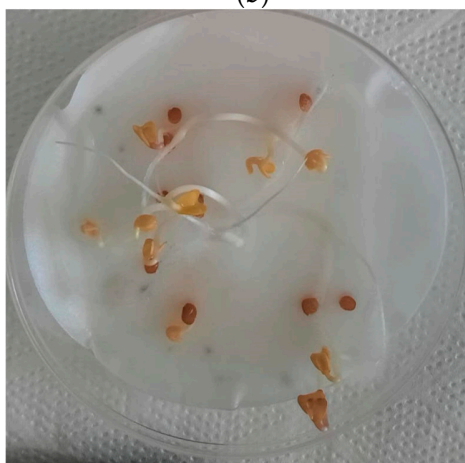

(c)

**Figure S1.** Radishes seedlings growth germination bioassay using 0.1% extract (a), solvent (b) and control (c).
